# Supplementary material
Source: HighWire-hosted journal article supplement (http://www.qdcxjkg.com/highwire/filestream/113269/field_highwire_adjunct_files/0/Hoogendoorn_2010_Online_data_supplement.pdf)
Supplement: Hoogendoorn_2010_Online_data_supplement.pdf [file Hoogendoorn_2010_Online_data_supplement.pdf]

## **ONLINE DATA SUPPLEMENT**

of manuscript

### **Case-fatality of COPD exacerbations: a meta-analysis and statistical modeling approach**

**Martine Hoogendoorn, M.Sc.**

**Rudolf T Hoogenveen, M.Sc**

Maureen P Rutten-van Mölken, Ph.D.

Jørgen Vestbo, Ph.D.

Talitha Feenstra, Ph.D.

The survival function during the stable period for each study was parameterized using three parameters:

$$S(t) = (1-g) \text{Exp}[-\alpha t - \beta t^2]$$

with  $t$  time, with  $x=0$  being time of onset of exacerbation

$S(t)$  survival probability

$\alpha, \beta$  parameters that define the non-linear change over time

$g$  case-fatality of an exacerbation

Table 1: Median parameter values (95% uncertainty interval) of the survival function

| 1 <sup>st</sup> author of the study,<br>year of publication | $\alpha$              | $\beta$                  | $g$                 |
|-------------------------------------------------------------|-----------------------|--------------------------|---------------------|
| Connors, 1996 (1)                                           | 0.482 (0.353-0.608)   | -0.117 (-0.164 - -0.071) | 0.174 (0.115-0.231) |
| Vestbo, 1998 (2)                                            | 0.132 (0.055-0.204)   | 0.001 (-0.013-0.018)     | 0.126 (0.058-0.184) |
| Groenewegen, 2003 (3)                                       | -0.006 (-0.087-0.069) | 0.016 (0-0.033)          | 0.179 (0.102-0.258) |
| Gunen, 2005 (4)                                             | 0.135 (0.058-0.228)   | -0.014 (-0.03-0.002)     | 0.17 (0.079-0.254)  |
| McGhan, 2007 (5)                                            | 0.229 (0.22-0.238)    | -0.01 (-0.012- - 0.008)  | 0.114 (0.106-0.122) |
| Brekke, 2008(6)#                                            | 0.191 (0.187-0.195)   | -0.017 (-0.018- -0.016)  | 0.190 (0.187-0.193) |

# Based on patient-level data

## References:

- (1) F. CA, Jr, Dawson NV, Thomas C, E. HF, Jr, Desbiens N, Fulkerson WJ, Kussin P, Bellamy P, Goldman L, Knaus WA. Outcomes following acute exacerbation of severe chronic obstructive lung disease. The SUPPORT investigators (Study to Understand Prognoses and Preferences for Outcomes and Risks of Treatments). *Am J Respir Crit Care Med* 1996;154:959-67.
- (2) Vestbo J, Prescott E, Lange P, Schnohr P, Jensen G. Vital prognosis after hospitalization for COPD: a study of a random population sample. *Respir Med* 1998;92:772-6.
- (3) Groenewegen KH, Schols AM, Wouters EF. Mortality and mortality-related factors after hospitalization for acute exacerbation of COPD. *Chest* 2003;124:459-67.
- (4) Gunen H, Hacievliyagil SS, Kosar F, Mutlu LC, Gulbas G, Pehlivan E, Sahin I, Kizkin O. Factors affecting survival of hospitalised patients with COPD. *Eur Respir J* 2005;26:234-41.
- (5) McGhan R, Radcliff T, Fish R, Sutherland ER, Welsh C, Make B. Predictors of rehospitalization and death after a severe exacerbation of COPD. *Chest* 2007;132:1748-55.
- (6) Brekke PH, Omland T, Holmedal SH, Smith P, Soyseth V. Troponin T elevation and long-term mortality after chronic obstructive pulmonary disease exacerbation. *Eur Respir J* 2008;31:563-70.
